# Supplementary material for: Preparation and self-assembly of ionic (PNIPAM-co-VIM) microgels and their adsorption property for phosphate ions
Source: Royal Society of Chemistry journal article supplement (doi:10.1039/d2ra06678e), 2023-01-01
Supplement: d2ra06678e1.pdf [file d2ra06678e1.pdf]

## Electronic Supplementary Information

### **Preparation and self-assembly of ionic (PNIPAM-co-VIM) microgels and their adsorption property for phosphate ions**

Jianping Yang,<sup>1,\*</sup> Bei Huang,<sup>2</sup> Zhengxiang Lv,<sup>1</sup> Zheng Cao<sup>2,3,\*</sup>

*1 Department of Orthopedics, Changzhou Hospital of Traditional Chinese Medicine, 25 Heping North Road, Changzhou, 213000, Jiangsu, P. R. China*

*2 Jiangsu Key Laboratory of Environmentally Friendly Polymeric Materials, School of Materials Science and Engineering, Jiangsu Collaborative Innovation Center of Photovoltaic Science and Engineering, Changzhou University, Changzhou 213164, Jiangsu, P. R. China*

*3 National Experimental Demonstration Center for Materials Science and Engineering (Changzhou University), Changzhou, 213164, P. R. China*

\*Correspondence author: [43655304@qq.com](mailto:43655304@qq.com); [zcao@cczu.edu.cn](mailto:zcao@cczu.edu.cn)

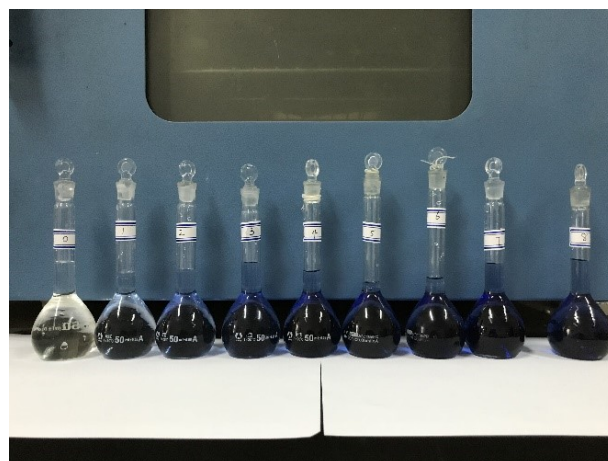

Fig. S1. Visual appearance of blank solution and phosphomolybdate blue solutions prepared by eight groups of phosphate solutions with different concentrations.

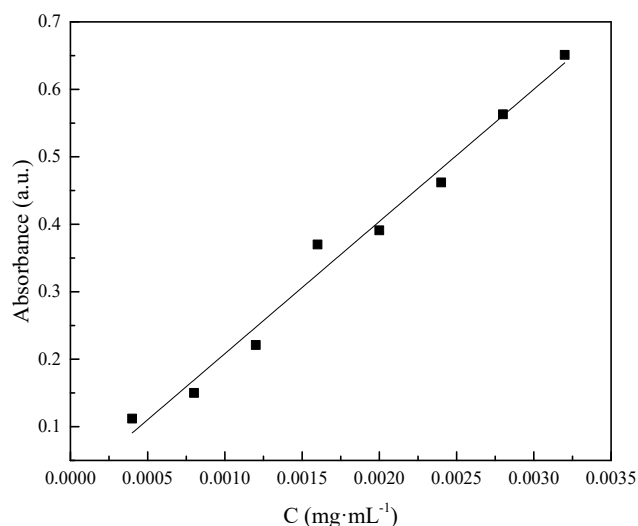

Fig. S2. The standard work curve of phosphate anion solutions and linear fitting of experimental data.

The standard work curve is established, as shown in Fig. S2, after having carried out the procedure of standard work curve. The linear equation is:  $y = 195.89286x + 0.01239$ , where  $x$  is the concentration of phosphate ( $\text{mg L}^{-1}$ ) and the linear scope of phosphate concentration is  $0.4\text{-}3.2 \text{ mg L}^{-1}$ , and  $y$  is the absorbance. The linear correlation coefficient  $R$  is 0.98, that means that this linear equation has a better linear correlation and can satisfy the photometric measurement of phosphate.

Table S1. The composition, weight-average molecular weights ( $M_w$ ), and polydispersity indexes (PDI) of P(NIPAM-co-VIM) copolymers with different VIM mass fractions of 11%, 30%, 50%, and 70%.

| Sample No.          | Feed ratio of NIPAM/VIM |         | Real ratio of                 | $M_w$<br>by GPC    | PDI<br>by GPC |
|---------------------|-------------------------|---------|-------------------------------|--------------------|---------------|
|                     | wt/wt                   | mol/mol | NIPAM/VIM from NMR<br>mol/mol |                    |               |
| P(NIPAM-co-VIM)-11% | 1/0.11                  | 1/0.14  | 1/0.12                        | $6.14 \times 10^4$ | 1.99          |
| P(NIPAM-co-VIM)-30% | 1/0.30                  | 1/0.38  | 1/0.33                        | $5.95 \times 10^4$ | 2.01          |
| P(NIPAM-co-VIM)-50% | 1/0.5                   | 1/0.63  | 1/0.55                        | $5.63 \times 10^4$ | 2.12          |
| P(NIPAM-co-VIM)-70% | 1/0.7                   | 1/0.89  | 1/0.82                        | $4.92 \times 10^4$ | 2.23          |

The molecular weight and molecular weight distribution of the linear copolymer were determined by Water 150C gel permeation chromatography (GPC), the liquid phase was N, N-dimethylformamide, and the sample concentration was 0.3 wt%.  $^1\text{H}$  NMR spectroscopy was determined using a 400 MHz Varian Mercury Plus NMR spectrometer using heavy water or deuterated chloroform as a solvent, and the solution concentration was approximately 10 mg/mL.

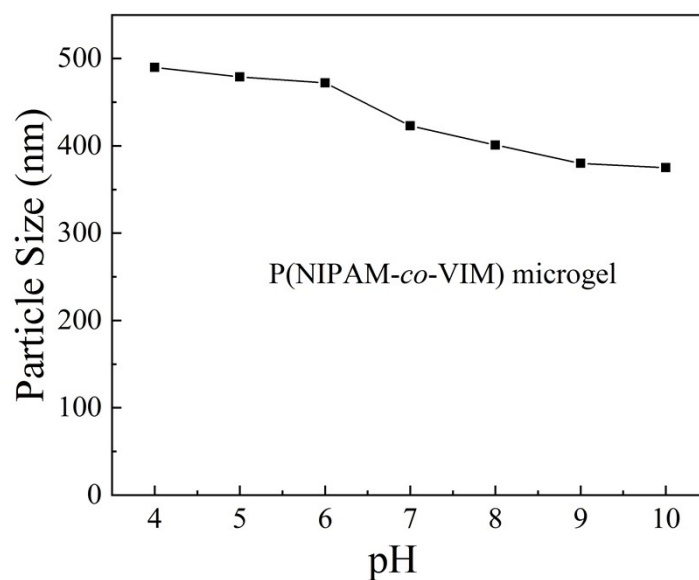

Fig. S3. The particle size of the final swelling P(NIPAM-co-VIM) microgels as a function of pH.
